# Supplementary material for: Polymer dynamics at low molecular weight of poly(butylene oxide) star polymers
Source: Royal Society of Chemistry journal article supplement (doi:10.1039/d4sm01179a), 2025-01-01
Supplement: d4sm01179a1.pdf [file d4sm01179a1.pdf]

Supporting Information  
Polymer Dynamics at Low Molecular Weight of Poly(butylene oxide) Star  
Polymers

**<sup>1</sup>Karin J. Bichler<sup>+,\*</sup>, <sup>1</sup>Bruno Jakobi, <sup>1,2</sup>Gerald J. Schneider<sup>\*</sup>**

<sup>1</sup> Louisiana State University, Department of Chemistry, Baton Rouge, 70803, LA

<sup>2</sup> Louisiana State University, Department of Physics and Astronomy, Baton Rouge, 70803, LA

<sup>+</sup> Current address: Oak Ridge National Laboratory, Oak Ridge, 37831, TN

## Dielectric Spectroscopy

### Temperature Dependence of Dielectric Normal Mode and Segmental Relaxation – Linear PBO

**Table S1:** Fit parameter for the VFT description of dielectric normal mode and segmental relaxation of linear PBO. See main text for explanation of parameter.

| Sample                        | $\tau_{\infty}$ (s)            | $A$ (1/K)         | $T_0$ (K)       |
|-------------------------------|--------------------------------|-------------------|-----------------|
| <b>Dielectric Normal Mode</b> |                                |                   |                 |
| linPBO2.6                     | $(1.2 \pm 0.1) \cdot 10^{-11}$ | $1584.3 \pm 17.1$ | $144.1 \pm 0.5$ |
| linPBO4.2                     | $(5.4 \pm 0.5) \cdot 10^{-11}$ | $1528.8 \pm 21.4$ | $147.5 \pm 0.8$ |
| linPBO8.5                     | $(3.0 \pm 0.2) \cdot 10^{-10}$ | $1547.2 \pm 19.8$ | $148.6 \pm 0.8$ |
| linPBO15.5                    | $(1.5 \pm 0.1) \cdot 10^{-9}$  | $1557.7 \pm 22.5$ | $149.1 \pm 0.9$ |
| linPBO23.5                    | $(6.0 \pm 0.4) \cdot 10^{-9}$  | $1493.8 \pm 18.5$ | $152.2 \pm 0.8$ |
| linPBO31.5                    | $(1.9 \pm 0.2) \cdot 10^{-8}$  | $1439.8 \pm 20.5$ | $154.8 \pm 0.9$ |
| linPBO44.4                    | $(9.2 \pm 2.1) \cdot 10^{-8}$  | $1352.9 \pm 53.4$ | $158.1 \pm 2.2$ |
| linPBO51.4                    | $(1.2 \pm 0.3) \cdot 10^{-7}$  | $1353.9 \pm 59.5$ | $159.5 \pm 2.7$ |
| linPBO62.4                    | $(2.1 \pm 0.3) \cdot 10^{-7}$  | $1370.9 \pm 39.9$ | $159.5 \pm 1.9$ |
| <b>Segmental Relaxation</b>   |                                |                   |                 |
| linPBO2.6                     | $(2.6 \pm 0.7) \cdot 10^{-12}$ | $1016.1 \pm 34.4$ | $161.6 \pm 1.0$ |
| linPBO4.2                     | $(2.3 \pm 0.5) \cdot 10^{-12}$ | $1025.1 \pm 25.9$ | $163.1 \pm 0.7$ |
| linPBO8.5                     | $(2.1 \pm 0.5) \cdot 10^{-12}$ | $1044.2 \pm 28.4$ | $164.1 \pm 0.8$ |
| linPBO15.5                    | $(2.3 \pm 0.5) \cdot 10^{-12}$ | $1036.1 \pm 27.4$ | $164.9 \pm 0.8$ |
| linPBO23.5                    | $(2.1 \pm 0.5) \cdot 10^{-12}$ | $1046.9 \pm 32.3$ | $165.1 \pm 0.9$ |
| linPBO31.5                    | $(1.9 \pm 0.4) \cdot 10^{-12}$ | $1060.2 \pm 25.3$ | $164.6 \pm 0.7$ |
| linPBO44.4                    | $(2.4 \pm 0.5) \cdot 10^{-12}$ | $1029.6 \pm 25.4$ | $165.6 \pm 0.7$ |
| linPBO51.4                    | $(3.1 \pm 0.7) \cdot 10^{-12}$ | $998.1 \pm 28.8$  | $166.8 \pm 0.8$ |
| linPBO62.4                    | $(2.6 \pm 0.6) \cdot 10^{-12}$ | $1026.5 \pm 27.6$ | $165.9 \pm 0.8$ |

## Temperature Dependence of Dielectric Normal Mode and Segmental Relaxation – Star PBO

**Table S2:** Fit parameter for the VFT description of dielectric normal mode and segmental relaxation of star PBO. See main text for explanation of parameter.

| Sample                        | $\tau_{\infty}$ (s)            | $A$ (1/K)         | $T_0$ (K)       |
|-------------------------------|--------------------------------|-------------------|-----------------|
| <b>Dielectric Normal Mode</b> |                                |                   |                 |
| starPBO3.7                    | $(4.5 \pm 0.5) \cdot 10^{-11}$ | $1613.7 \pm 23.5$ | $148.8 \pm 0.8$ |
| starPBO6.7                    | $(2.2 \pm 0.1) \cdot 10^{-10}$ | $1583.9 \pm 16.6$ | $149.5 \pm 0.6$ |
| starPBO11.7                   | $(9.7 \pm 0.8) \cdot 10^{-10}$ | $1601.7 \pm 20.1$ | $148.9 \pm 0.8$ |
| starPBO19.3                   | $(5.4 \pm 0.6) \cdot 10^{-9}$  | $1602.1 \pm 28.2$ | $149.6 \pm 1.1$ |
| <b>Segmental Relaxation</b>   |                                |                   |                 |
| starPBO3.7                    | $(2.5 \pm 0.5) \cdot 10^{-12}$ | $1025.9 \pm 26.4$ | $166.3 \pm 0.8$ |
| starPBO6.7                    | $(3.2 \pm 0.8) \cdot 10^{-12}$ | $988.4 \pm 30.3$  | $168.1 \pm 0.9$ |
| starPBO11.7                   | $(3.2 \pm 0.7) \cdot 10^{-12}$ | $996.8 \pm 27.3$  | $167.3 \pm 0.8$ |
| starPBO19.3                   | $(2.8 \pm 0.6) \cdot 10^{-12}$ | $1010.7 \pm 25.4$ | $167.5 \pm 0.7$ |

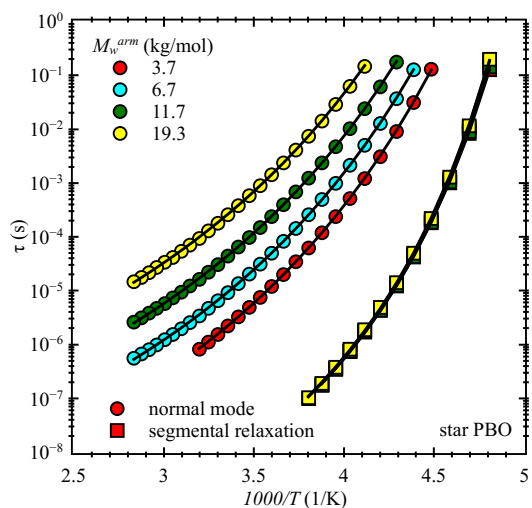

**Figure S1:** Relaxation time,  $\tau$ , as a function of  $1000/T$  for dielectric normal mode and segmental relaxation of star PBO with different arm molecular weight as indicated. Solid lines are the best description with the VFT equation.

## Dynamics Storage and Loss Moduli of Linear PBO and Star PBO

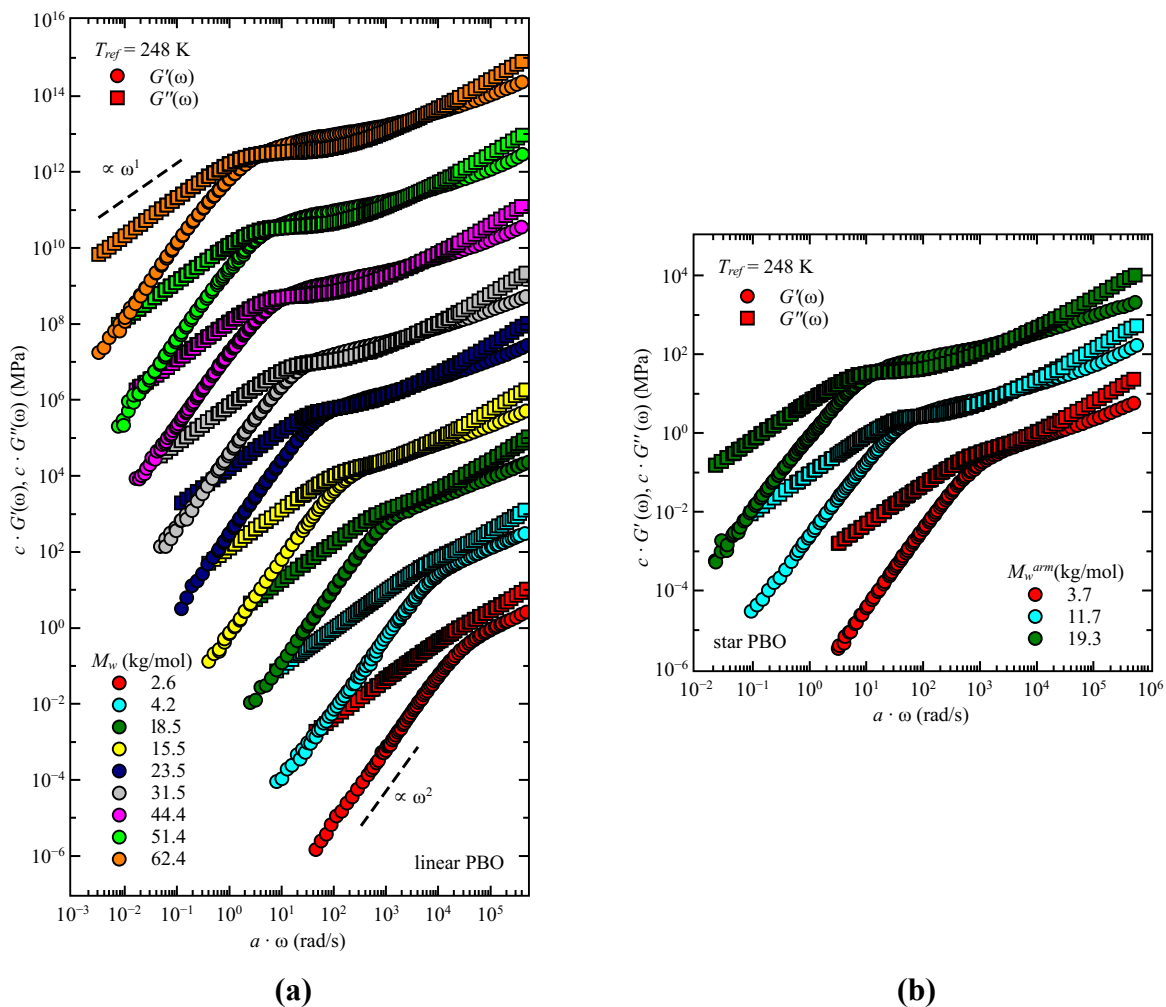

**Figure S2:** Storage,  $G'(\omega)$ , and loss,  $G''(\omega)$ , moduli as a function of frequency,  $\omega$ , **(a)** linear PBO, and **(b)** star PBO at the reference temperature,  $T_{ref} = 248$  K for all the investigated molecular weight as indicated.  $G'(\omega)$ , and  $G''(\omega)$  are shifted vertically by an arbitrary factor,  $c$ , for clarity.

## Frequency Dependence of Complex Viscosity

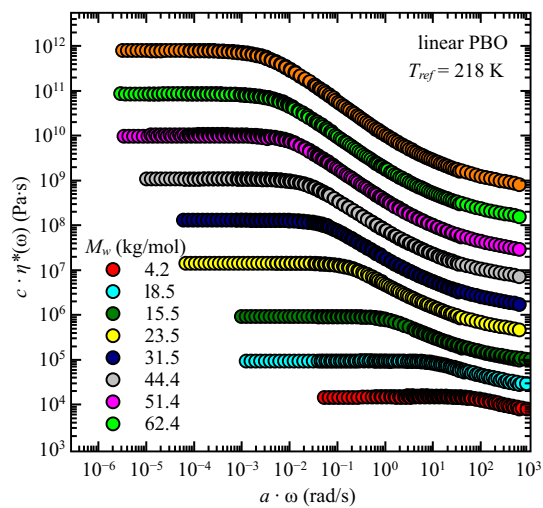

**Figure S3:** Complex viscosity,  $\eta^*$ , as a function of frequency,  $\omega$ , for linear PBO with molecular weight  $M_w$  as indicated at reference temperature,  $T_{ref} = 218$  K

## Gel Permeations Chromatography (GPC)

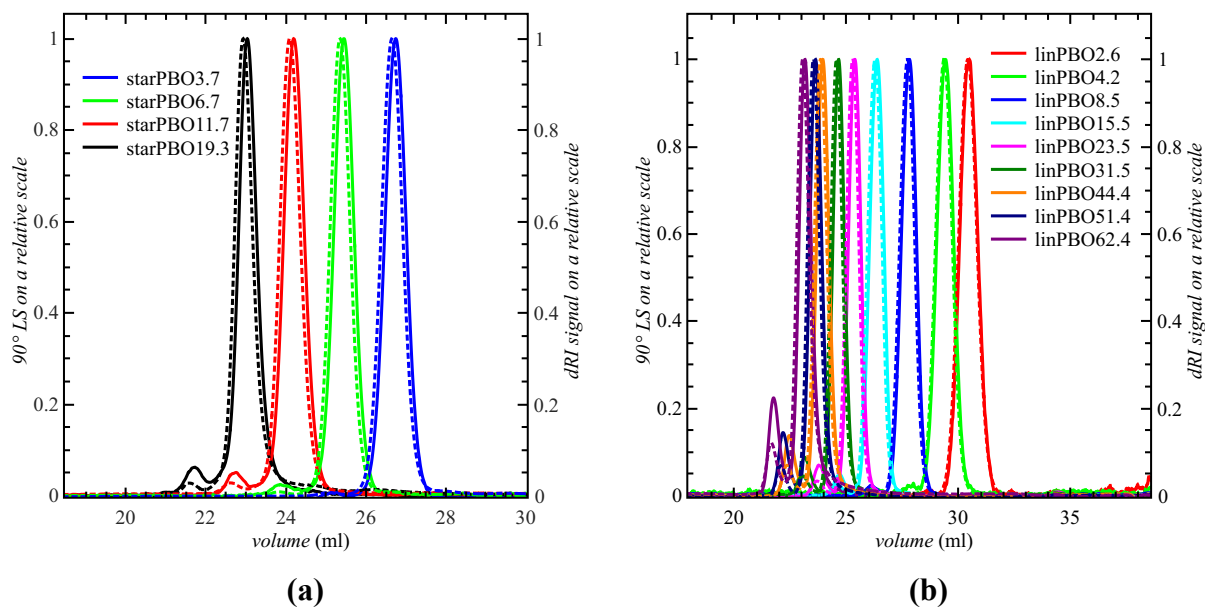

**Figure S4:** 90° light scattering (LS) signal for the GPC-MALLS chromatogram on a relative scale (solid line), and differential refractive index (dRI) (dotted lines) for **(a)** star PBO and **(b)** linear PBO.
